# Supplementary material
Source: PubMed Central journal article supplement (PMC5274581)

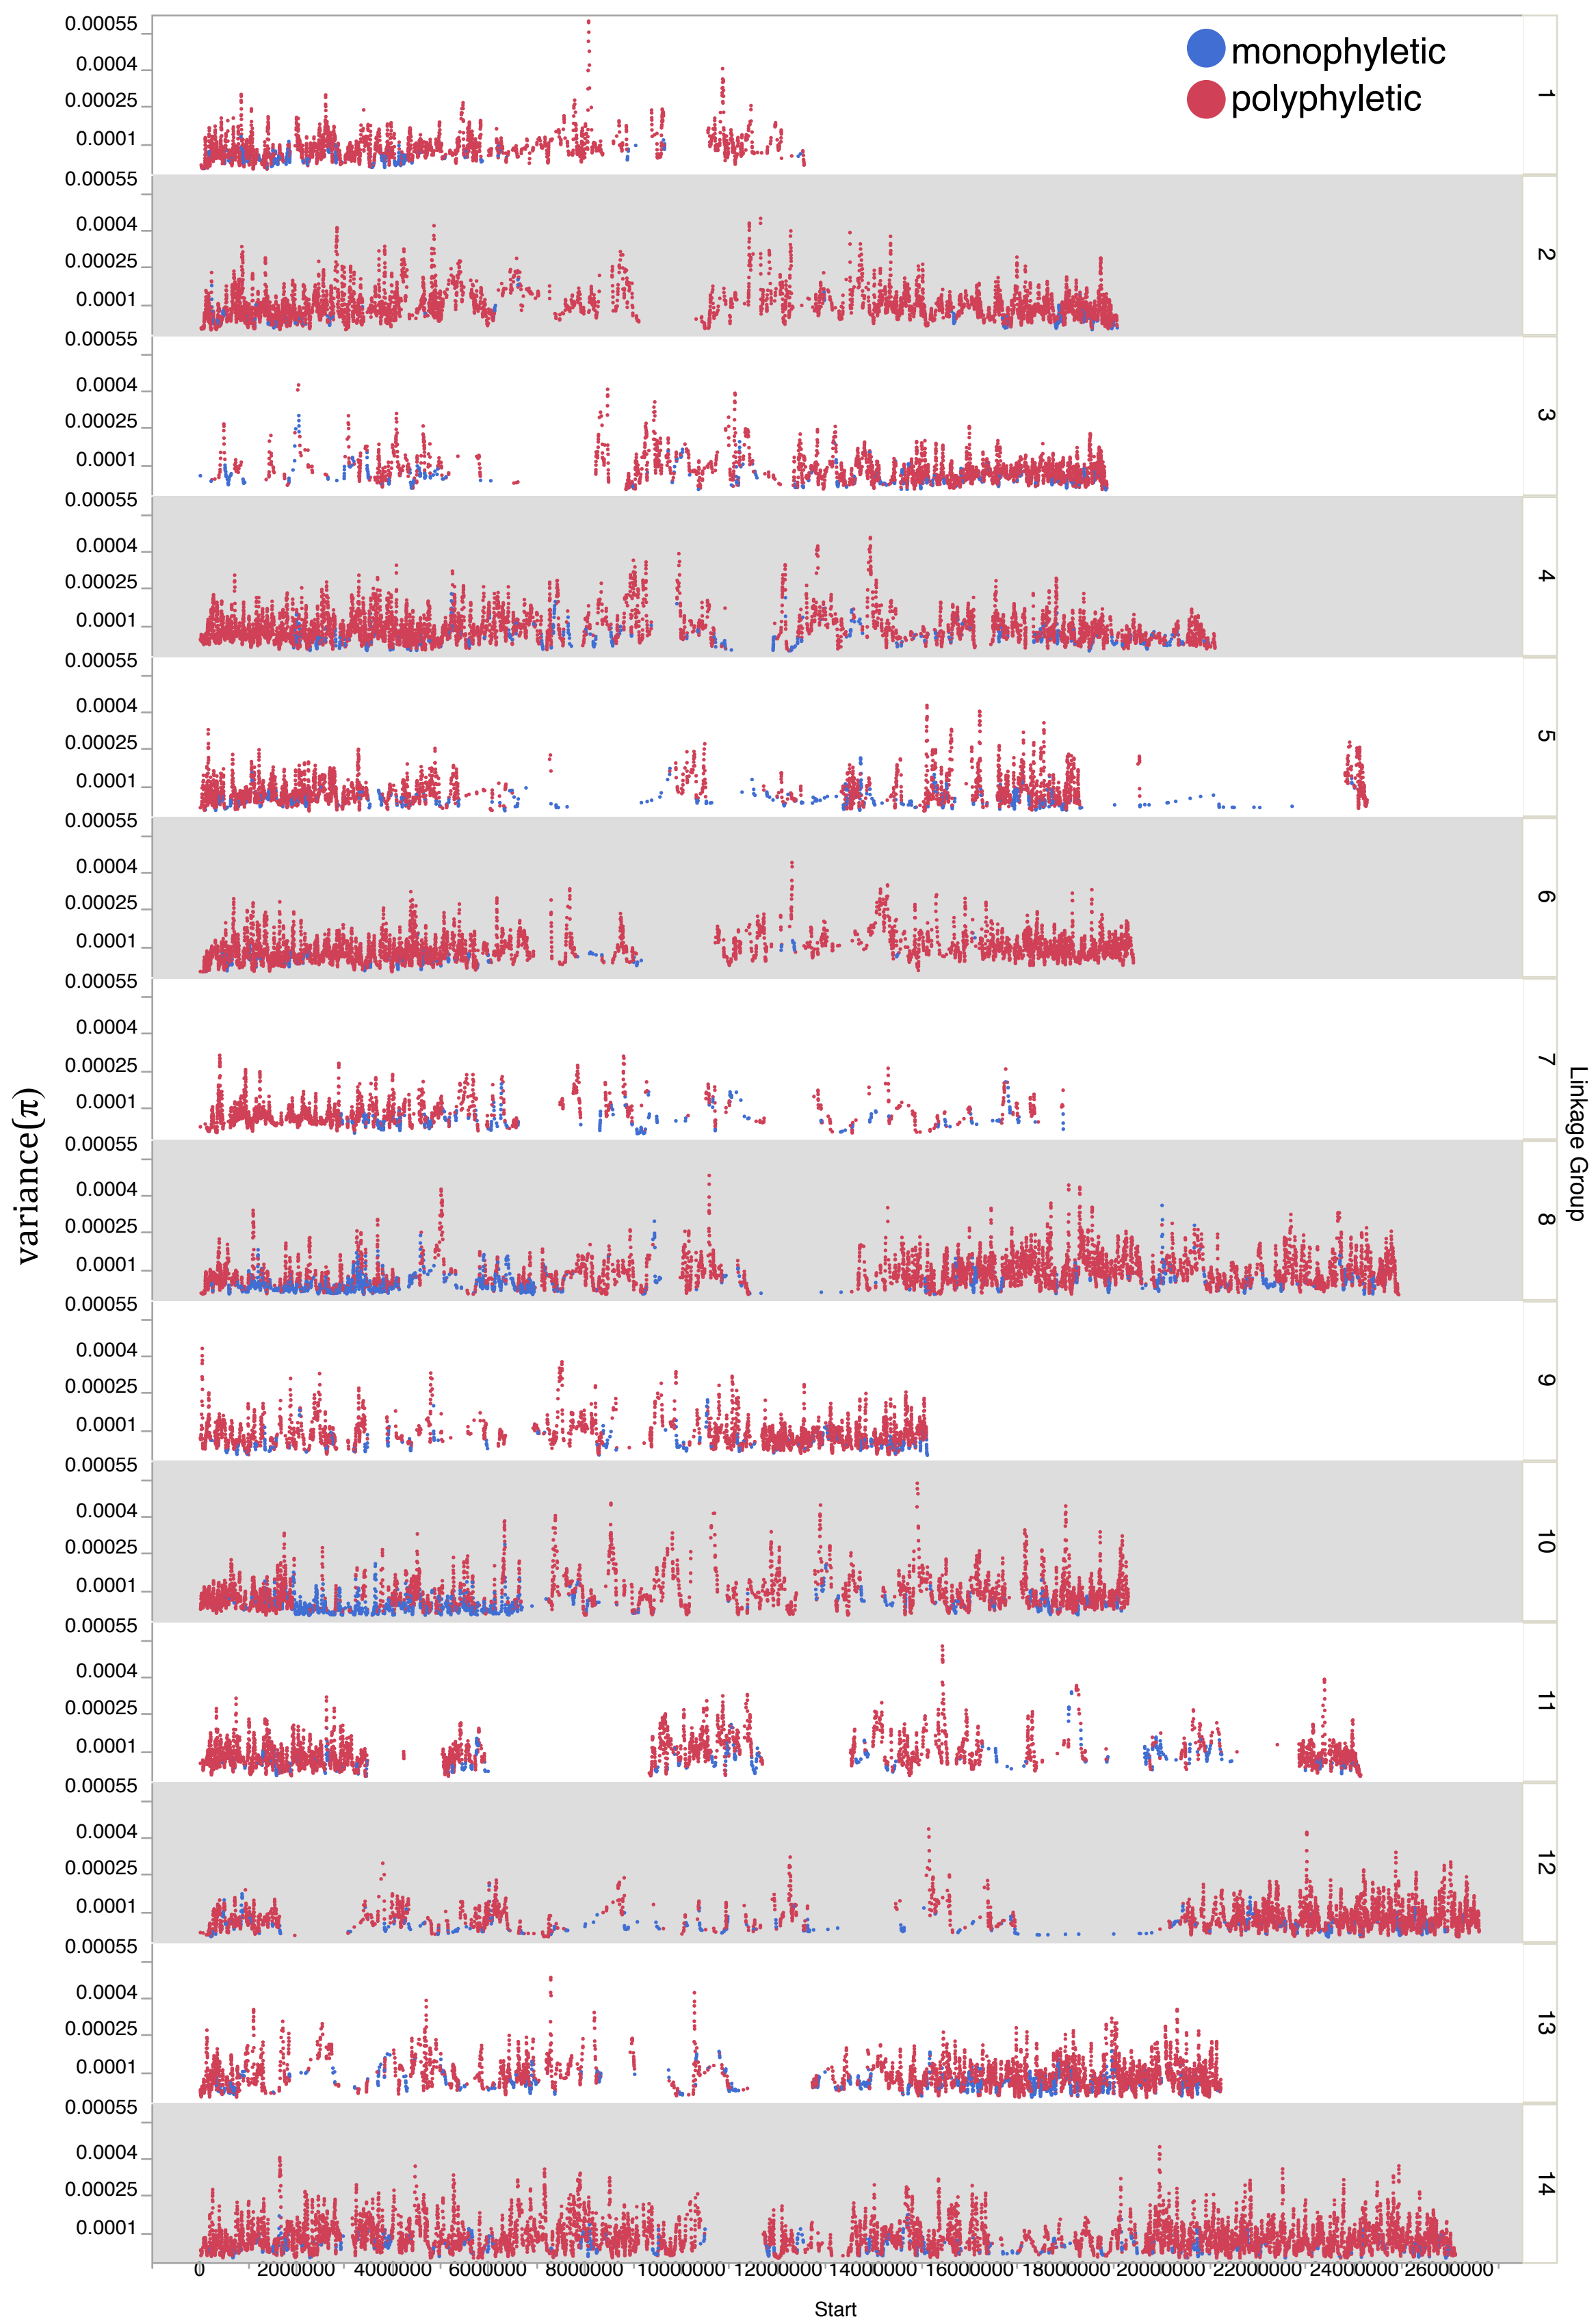

Supplement: NIHMS829811-supplement-Supp_FigS10.pdf [file NIHMS829811-supplement-Supp_FigS10.pdf]

$\pi$

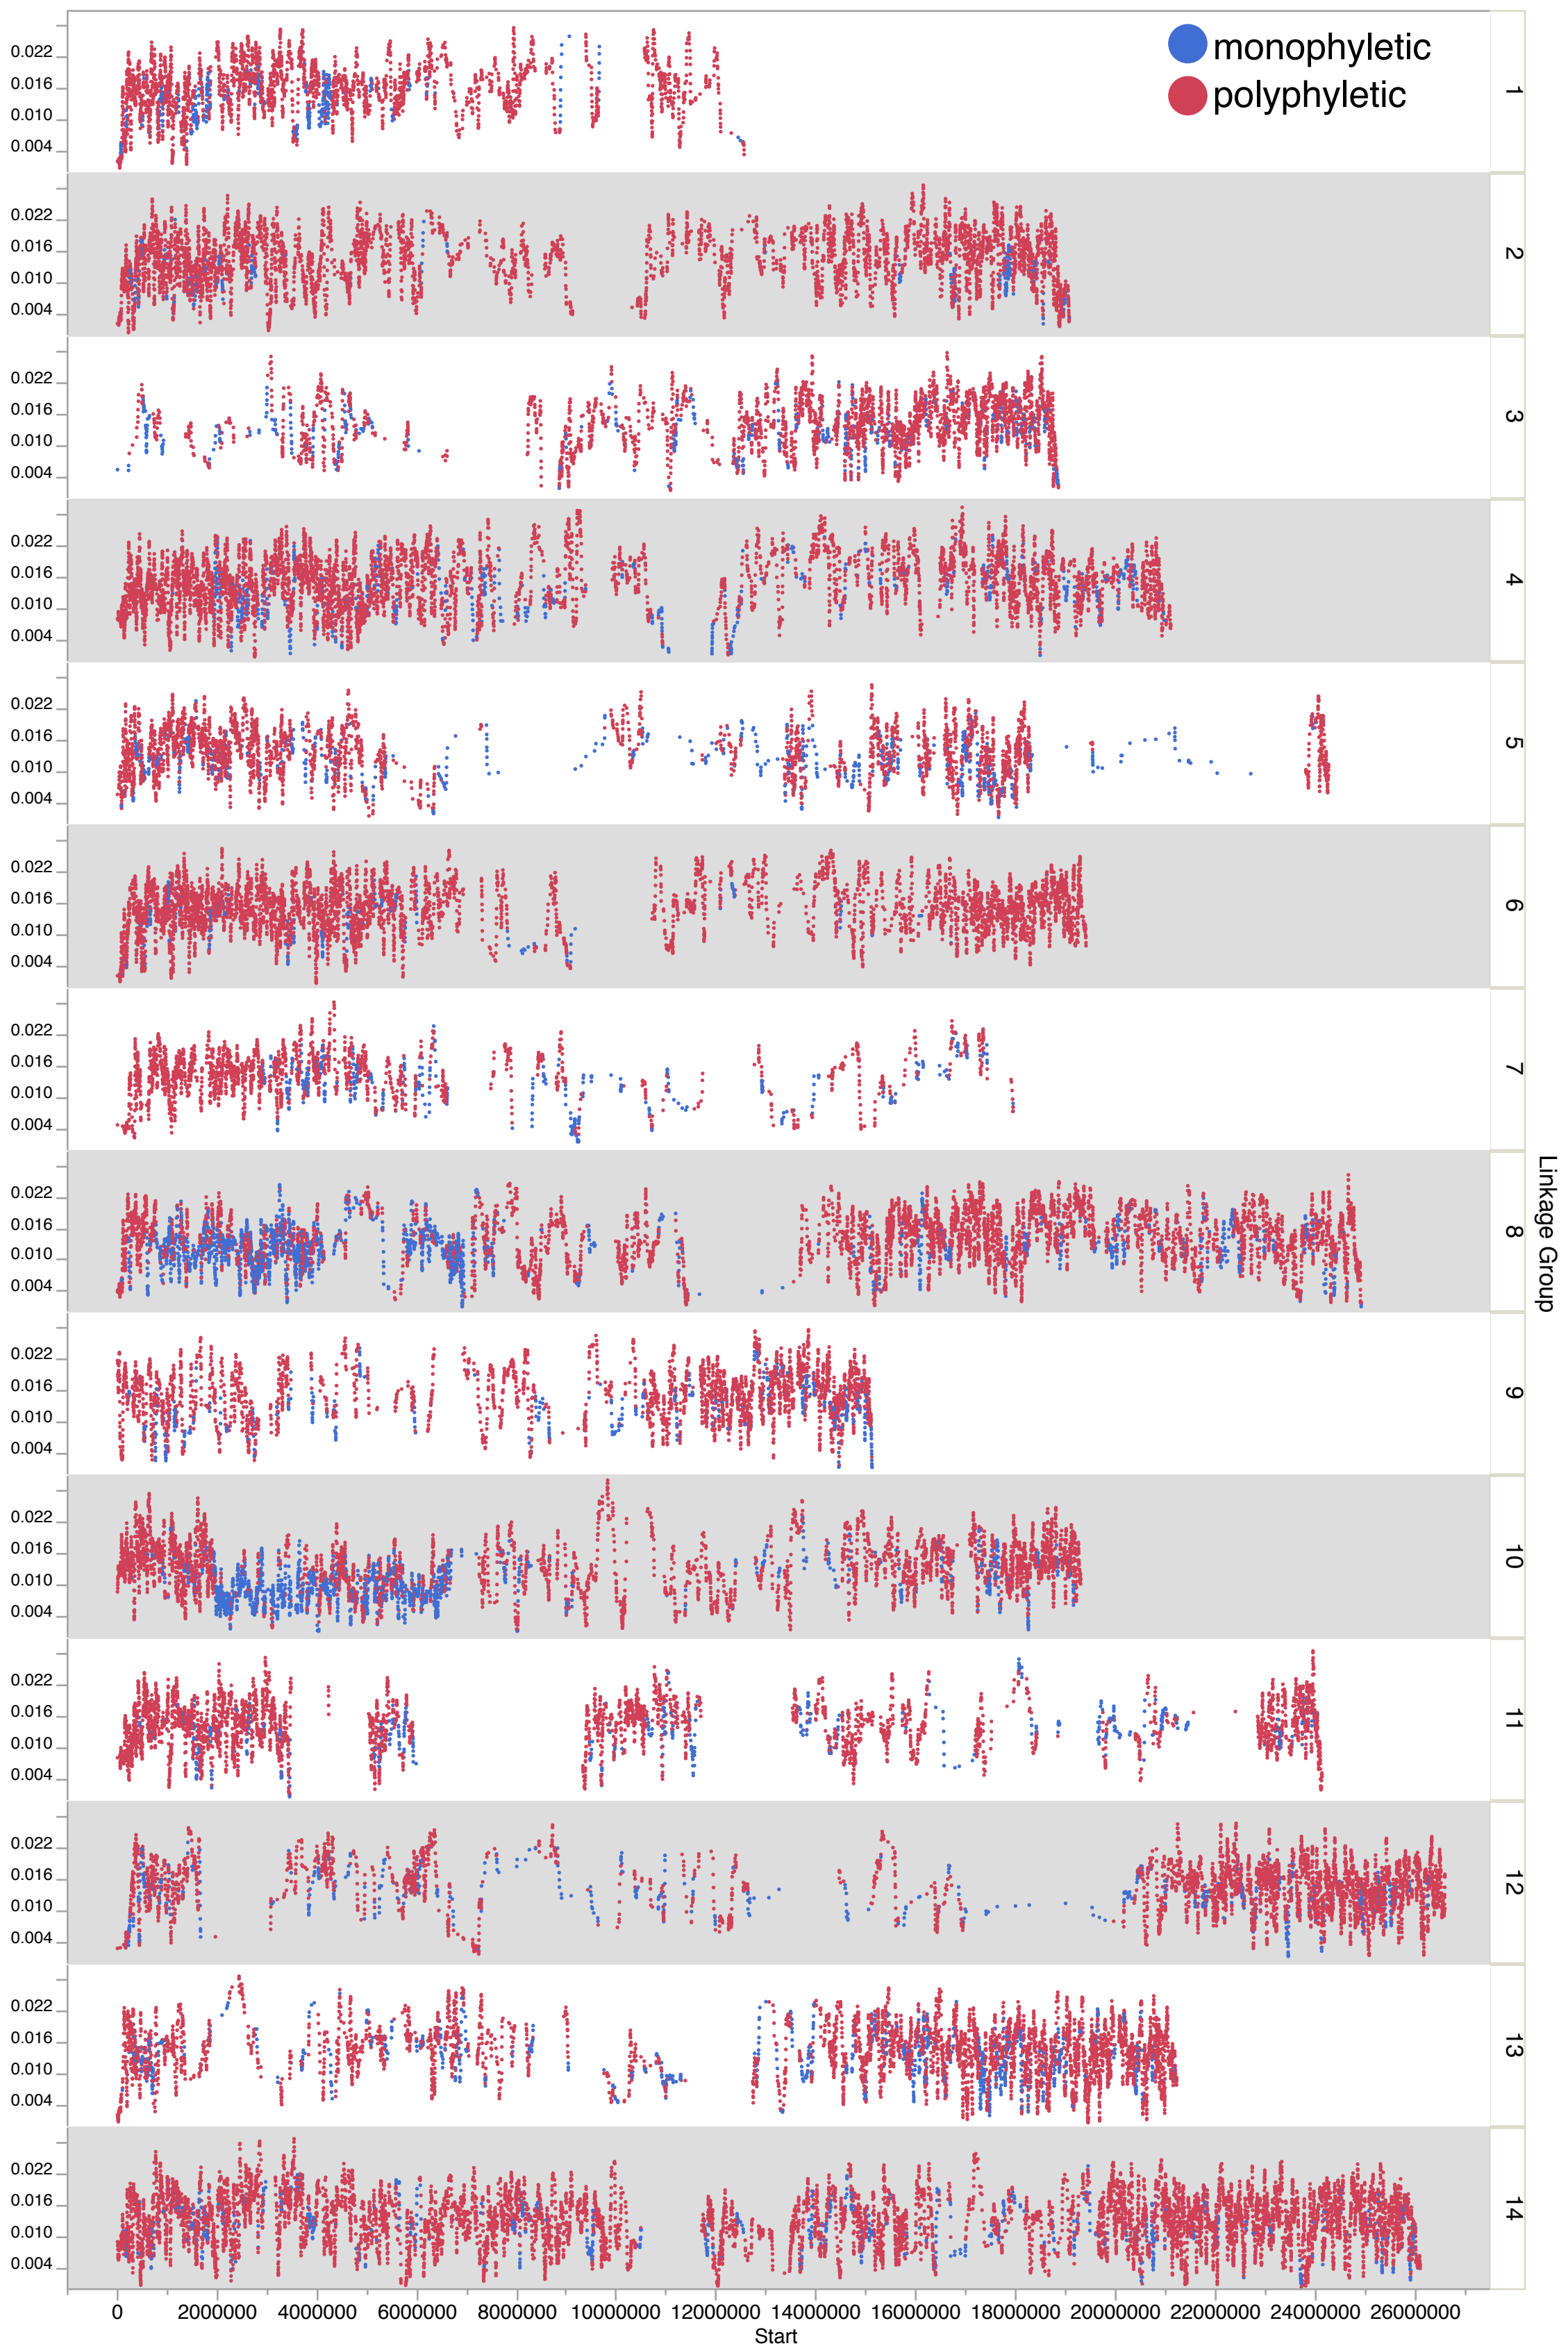

Supplement: NIHMS829811-supplement-Supp_Fig_S9.pdf [file NIHMS829811-supplement-Supp_Fig_S9.pdf]
